# Supplementary material
Source: PubMed Central journal article supplement (PMC3076728)
Supplement: NIHMS269990-supplement-1_si_001.pdf [file NIHMS269990-supplement-1_si_001.pdf]

**Table S1. The 10 ER agonists/antagonists with the highest predicted IC<sub>50</sub>s, as predicted by the regression model.** The names of the compounds are given along with their targets and original energy scores from eHiTS.

| ranking from regression model | predicted IC <sub>50</sub> from regression model (nM) | ER agonist/antagonist               | ER targets in BindingDB | original eHiTS energy score (pKi) |
|-------------------------------|-------------------------------------------------------|-------------------------------------|-------------------------|-----------------------------------|
| 1                             | 18                                                    | GSK 5182                            | ERa, E-RRg              | -10.40                            |
| 2                             | 23                                                    | 4-hydroxytamoxifen 4-OHT analog, 16 | ERa, E-RRg              | -9.64                             |
| 3                             | 25                                                    | 4-hydroxytamoxifen 4-OHT analog, 6  | ERa, E-RRg              | -11.73                            |
| 4                             | 29                                                    | 4-hydroxytamoxifen 4-OHT analog, 5  | ERa, E-RRg              | -11.73                            |
| 5                             | 29                                                    | 4-hydroxytamoxifen 4-OHT analog, 11 | ERa, E-RRg              | -11.73                            |
| 6                             | 34                                                    | 4-hydroxytamoxifen 4-OHT analog, 4  | ERa, E-RRg              | -11.69                            |
| 7                             | 38                                                    | 4-hydroxytamoxifen 4-OHT analog, 12 | ERa, E-RRg              | -10.21                            |
| 8                             | 46                                                    | 4-hydroxytamoxifen 4-OHT analog, 9  | ERa, E-RRg              | -9.71                             |
| 9                             | 54                                                    | 4-hydroxytamoxifen 4-OHT analog, 10 | ERa, E-RRg              | -11.72                            |
| 10                            | 58                                                    | 4-hydroxytamoxifen 4-OHT analog, 14 | ERa, E-RRg              | -11.74                            |

**Table S2. The 10 most highly ranked ER agonists/antagonists, as predicted by the classification model.** The names of the compounds are given along with their targets and original energy scores from eHiTS.

| <b>ranking from classification model</b> | <b>ER agonist/antagonist</b>           | <b>ER targets in BindingDB</b> | <b>original eHiTS energy score (pKi)</b> |
|------------------------------------------|----------------------------------------|--------------------------------|------------------------------------------|
| 1                                        | piperidine derivative, 38c             | ERa, ERb                       | -11.74                                   |
| 2                                        | GSK 5182                               | ERa, E-RRg                     | -10.40                                   |
| 3                                        | 4-hydroxytamoxifen 4-OHT analog, 16    | ERa, E-RRg                     | -9.64                                    |
| 4                                        | pyrazolo[1,5-a]pyrimidine, 12c         | ERa, ERb                       | -11.74                                   |
| 5                                        | piperazine derivative, 47              | ERa, ERb                       | -11.74                                   |
| 6                                        | 4-hydroxytamoxifen 4-OHT_analog, 5     | ERa, E-RRg                     | -11.73                                   |
| 7                                        | piperazine derivative, 49              | ERa, ERb                       | -11.74                                   |
| 8                                        | 4-hydroxytamoxifen 4-OHT analog, 4     | ERa, E-RRg                     | -11.69                                   |
| 9                                        | tetrahydroisoquinoline derivative, 19e | ERa, ERb                       | -11.74                                   |
| 10                                       | 4-hydroxytamoxifen 4-OHT analog, 14    | ERa, E-RRg                     | -11.74                                   |
